# Supplementary material for: Red phosphorus confined in hierarchical hollow surface-modified Co9S8 for enhanced sodium storage
Source: Royal Society of Chemistry journal article supplement (doi:10.1039/d0se00251h), 2020-01-01
Supplement: d0se00251h1.pdf [file d0se00251h1.pdf]

## Supporting Information

### Red Phosphorus Confined in Hierarchical Hollow Surface-Modified Co<sub>9</sub>S<sub>8</sub> for Enhanced Sodium Storage

Huani Li<sup>a</sup>, Yuhao Zhang<sup>a</sup>, Beihou Liu<sup>a</sup>, Zhihui Gao<sup>a</sup>, Genfu Zhao<sup>a</sup>, Tingting Liu<sup>a</sup>, Xiang Gao<sup>b</sup>, Shubiao Xia<sup>c</sup>, Hong Guo<sup>a\*</sup>

- a. Prof. Hong Guo, School of Materials Science and Engineering, Yunnan University, No. 2, Green Lake North Road, Kunming 650091 China
- b. Center for high Pressure Science and Technology Advanced Research, Beijing 100094, China
- c. Center for Yunnan-Guizhou Plateau Chemical Functional Materials and Pollution Control, Qujing Normal University, Qujing 655011, China

## Experimental

### Chemicals

cetyltrimethylammonium bromide (CTAB, 99%), tetraethoxysilane (99%), ammonia solution (25 wt%, AR), polyvinylpyrrolidone (PVP), cobalt acetate tetrahydrate (AR), ammonium chloride (AR, ≥99.5%), sodium sulfide nonahydrate (AR, ≥98.0%) was purchased from Sigma. All chemicals were used as received without further purification.

### Synthesis of SiO<sub>2</sub> hollow spheres

A modified Stöber method was used to synthesize SiO<sub>2</sub> spheres with a diameter of about 400 nm. 0.16g CTAB (cetyltrimethylammonium bromide, 99%), 1.5mL ammonia (25%) was dispersed into 120mL ethanol and 30mL H<sub>2</sub>O. Subsequently, the solution was transferred to a three-necked flask, stirred vigorously, and 1.0 mL of tetraethoxysilane (99%) was slowly added. Then, the reaction was kept in a microwave synthesizer at a constant temperature of 60°C continuously stirred for 3 hours. The resulting precipitate was collected and washed several times with an absolute ethanol-HCl solution to remove CTAB, and finally dried under vacuum at 50 °C for 12 hours.

### Synthesis of Co-SiO<sub>2</sub> hierarchical hollow spheres

0.01 g of silica spheres were dispersed in 20 mL ethanol and 10 mL deionized water by stirring and ultrasound. After the SiO<sub>2</sub> was completely dispersed, 0.1 mmol Co (CH<sub>3</sub>COO)<sub>2</sub>·4H<sub>2</sub>O, 4 mmol NH<sub>4</sub>Cl and 0.6 mL of ammonia were added to form a

solution. Then it was poured into a polytetrafluoroethylene reactor, heated to a certain temperature and kept. When the autoclave was cooled to room temperature, the pink precipitate was collected and washed several times with deionized water and dried under vacuum at 50 °C overnight.

### **Characterization**

XRD patterns are carried out using a Bruker D8 Advance X-ray diffractometer at 40 kV and 40 mA over 10° to 90° 2 $\theta$  range with a Cu K $\alpha$  radiation. Sample morphology is examined by a scanning electron microscope (AMRAY 1000B) and transmission electron microscope (TEM, JEM-2010). Scanning transmission electron microscopy has also been performed using high angle annular dark field (HAADF-STEM) detectors. Nitrogen adsorption-desorption measurements are conducted at 77 K on a Micromeritics Tristar apparatus. The specific surface area is determined following the Brunauer-Emmet-Teller analysis. Raman spectra were carried out on RM-1000 (Renishaw) with an excitation laser of 632.8 nm. The X-ray photoelectron spectroscopy (XPS) measurement was carried out on Thermo ESCALAB 250XI spectrometer.

### **Electrochemical measurements**

For electrochemical performance evaluation, half-cell studies were performed. P@Co<sub>9</sub>S<sub>8</sub> composites (70 wt.%) was used as the working electrode with Super P carbon (20 wt.%) and sodium alginate (10 wt.%) in deionized water to form a uniform slurry which was then applied on copper foil and dried in vacuum at 80 °C for 48 h. The loading mass of P@Co<sub>9</sub>S<sub>8</sub> is calculated to be 4.5 mg cm<sup>-2</sup> and the coin-type cells using CR2025 were fabricated with 1 M NaClO<sub>4</sub> in ethylene carbonate/diethyl carbonate (1:1 vol.%) with 5wt.% fluoroethylene carbonate as the electrolyte, glass microfibers (Whatman) as separators and Na metal (Aladdin) as auxiliary electrodes. The coin cells are assembled in an argon-filled glove-box. The galvanostatic charge-discharge tests are at room temperature between 0.01 V and 2.0 V versus Na<sup>+</sup>/Na by a Land 2100A tester. The cyclic voltammetry (CV) is performed on Princeton electrochemical workstation between 0.01 and 3.0 V with a scan rate of 0.1 mV s<sup>-1</sup>.

### **Dissolution of sample**

The red P, Co<sub>9</sub>S<sub>8</sub> and P@Co<sub>9</sub>S<sub>8</sub> with the same surface area of 1m<sup>2</sup> were added into 1.5ml of liquid electrolyte. The mass of the accurate red P, Co<sub>9</sub>S<sub>8</sub> and P@Co<sub>9</sub>S<sub>8</sub>

composites added was determined by their respective specific surface areas. The samples were vigorously stirred and then kept standing for a month.

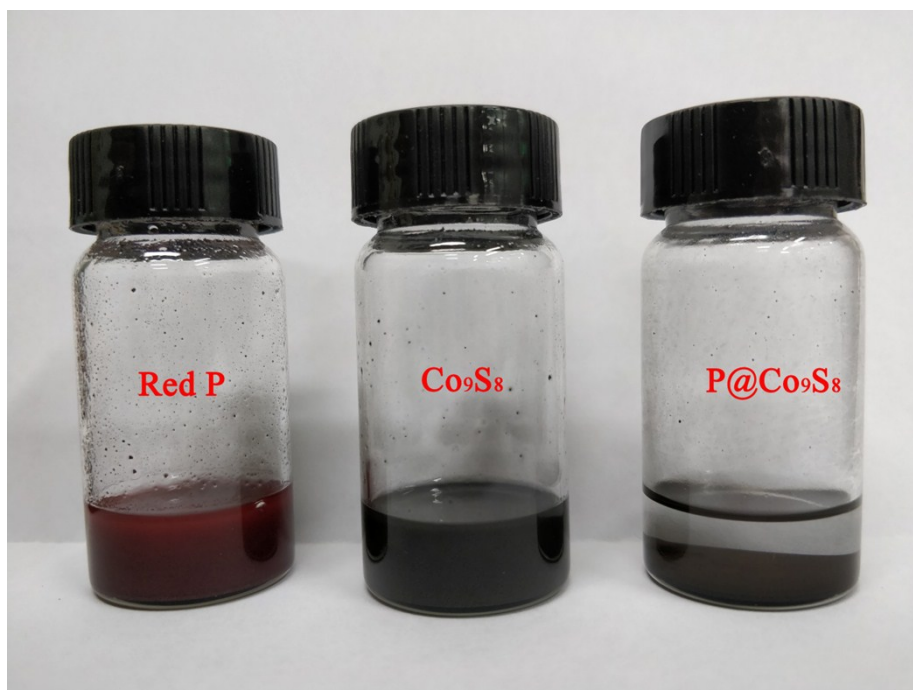

**Figure S1.** The solubility of red P, Co<sub>9</sub>S<sub>8</sub> and P@Co<sub>9</sub>S<sub>8</sub> in the liquid electrolyte.

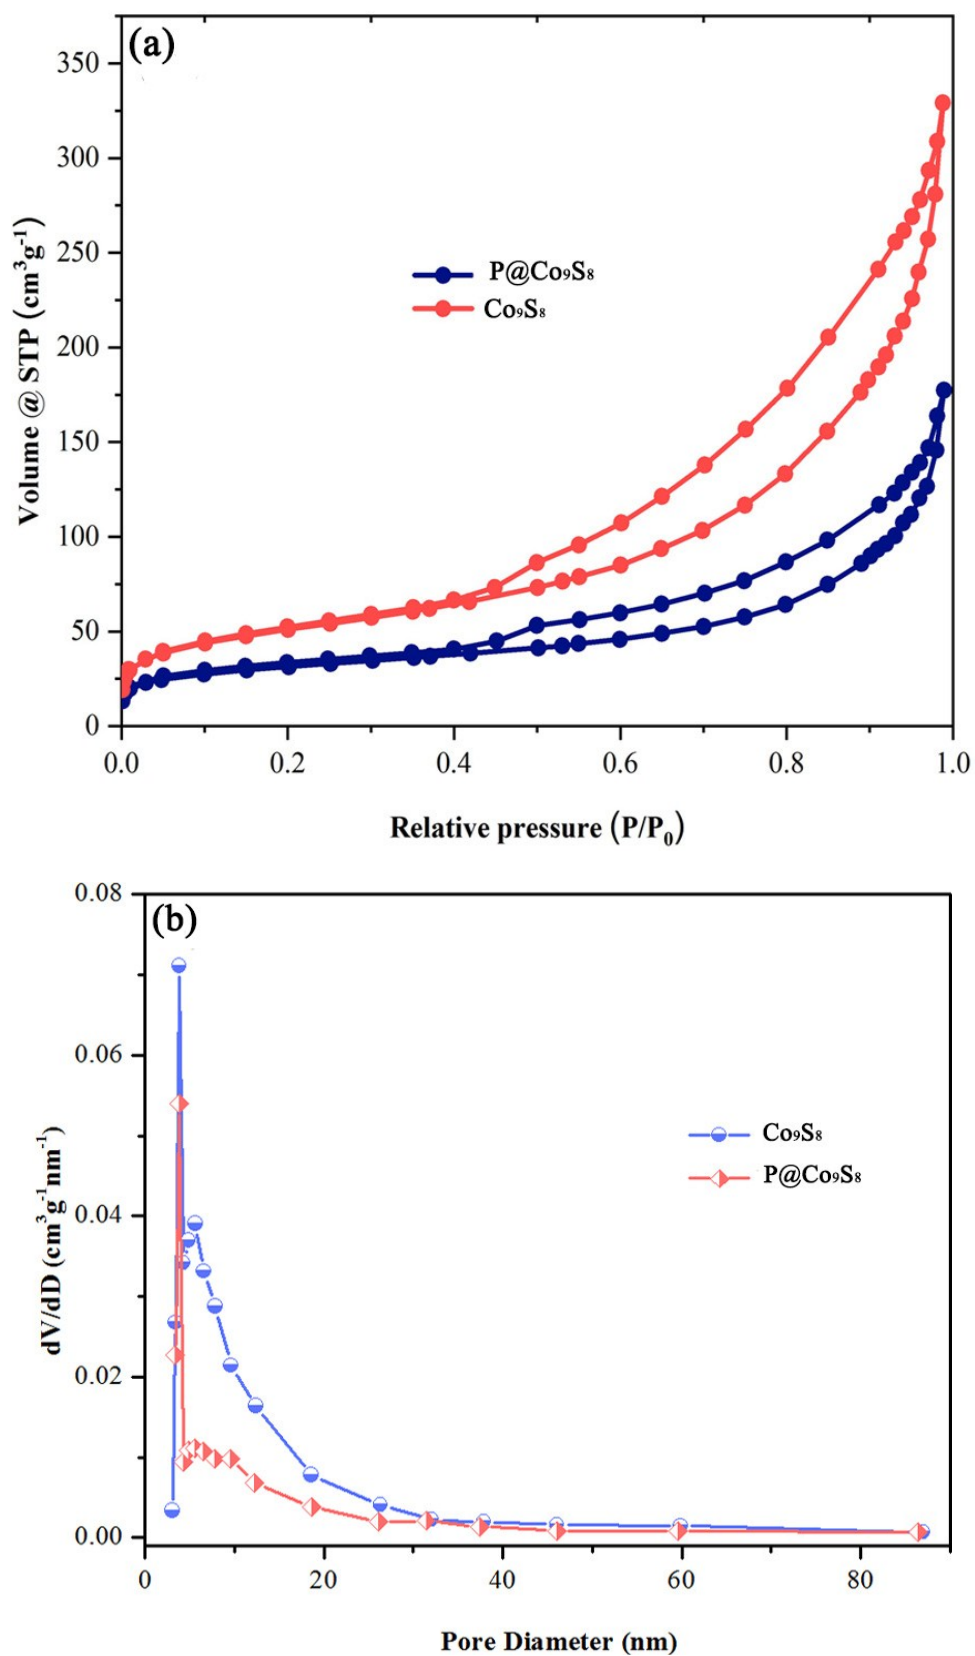

**Figure S2** (a) Nitrogen adsorption-desorption isotherms, (b) Pore size distribution of  $\text{P@Co}_9\text{S}_8$  and  $\text{Co}_9\text{S}_8$ .

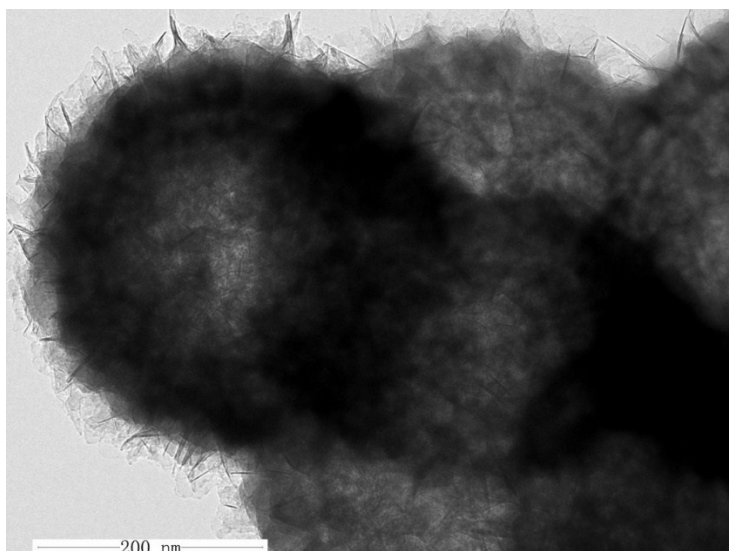

**Figure S3** Detailed TEM image of P@Co<sub>9</sub>S<sub>8</sub> electrode after 1000 cycles.

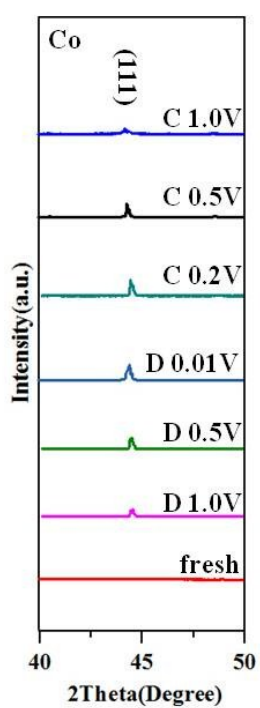

**Figure S4** The *ex-situ* XRD of the discharge-charge profile of P@Co<sub>9</sub>S<sub>8</sub> at different potentials for the 1<sup>st</sup> cycle at current density of 0.5 A g<sup>-1</sup>.

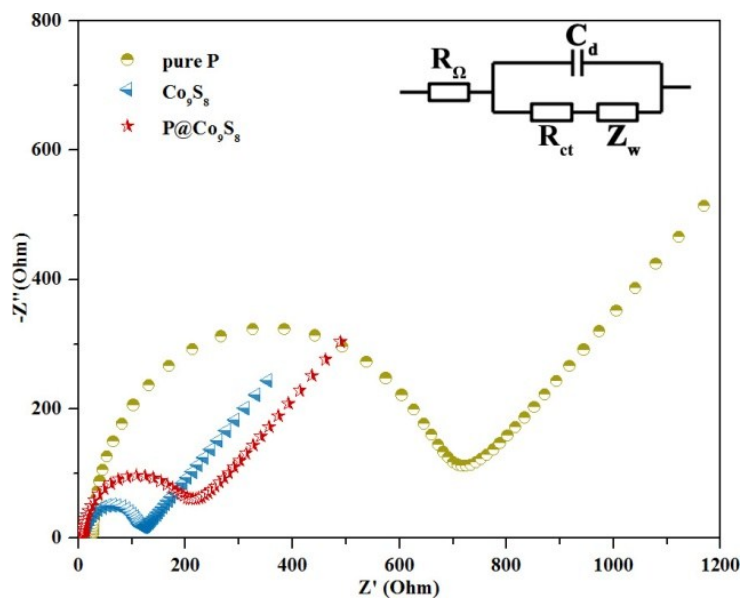

**Figure S5** Electrochemical impedance spectroscopy of P,  $\text{Co}_9\text{S}_8$  and  $\text{P}@\text{Co}_9\text{S}_8$ .

**Table S1** Comparison of cyclic stability between the current  $\text{P}@\text{Co}_9\text{S}_8$  composite anode and other representative red P based anodes in LIBs/SIBs.

| Materials                        | Method                  | Red P content<br>wt./% | Current density<br>/A g <sup>-1</sup> | Specific capacity<br>/mAh g <sup>-1</sup> | Ref           |
|----------------------------------|-------------------------|------------------------|---------------------------------------|-------------------------------------------|---------------|
| P-TiO <sub>2</sub> -C            | V/C                     | 60                     | 1                                     | 540<br>(after 100 cycles)                 | 1             |
| $\text{P}@\text{N-MPC}$          | V/C                     | 22.6                   | 1.0                                   | 450<br>(after 1000 cycles)                | 2             |
| SiC@graphene@RP                  | V/C                     | 30.16                  | 0.2                                   | 553<br>(after 100 cycles)                 | 3             |
| RP-SWCNT composite               | V/C                     | 60                     | 0.5                                   | 560<br>(after 200 cycles)                 | 4             |
| $\text{P}@\text{RGO}$            | Physical vapor position | 61.4                   | 1.6                                   | 914<br>(after 300 cycles)                 | 5             |
| RP/amorphous-TiO <sub>2</sub>    | Ball-milling            | 12.6                   | 0.1                                   | 369<br>(after 100 cycles)                 | 6             |
| $\text{P}@\text{Co}_9\text{S}_8$ | V/C                     | 50                     | 1                                     | 551.7<br>(after 1000 cycles)              | Current study |

**Table S2** Fitted impedance parameters of  $R_s$ ,  $R_{ct}$  and  $W$ .

| Electrode materials | $R_s(\Omega)$ | $R_{ct}(\Omega)$ | $W(\Omega)$ |
|---------------------|---------------|------------------|-------------|
| P                   | 20.87         | 616.1            | 99.1        |
| $Co_9S_8$           | 11.06         | 99.29            | 366.5       |
| P@ $Co_9S_8$        | 8.476         | 180.7            | 93.18       |

#### References

1. D.N. Lan, Q. Li, *ACS Appl. Energy Mater.*, 2019, 2(1):661-667.
2. W. Li, S. Hu, X. Luo, Z. Li, X. Sun, M. Li, F. Liu and Y. Yu, *Adv. Mater.*, 2017, 29, 1605820.
3. D. Zhao, B. Li, J. Zhang, X. Li, D. Xiao, C. Fu, L. Zhang, Z. Li, J. Li, D. Cao, C. Niu, *Nano Lett.*, 2017, 17, 3376
4. Y. Zhu, Y. Wen, X. Fan, T. Gao, F. Han, C. Luo, S.-C. Liou, C. Wang, *ACS Nano.*, 2017, 9, 3254.
5. Y. Liu, A. Zhang, C. Shen, Q. Liu and X. Cao, *ACS Nano.*, 2017, 11, 5530-5537.
6. H. Xiao, Y. Xia, Y. Gan, H. Huang, C. Liang, X. Tao, L. Xu, W. Zhang, *RSC Adv.*, 2016, 4, 60914.
